# Supplementary material
Source: PubMed Central journal article supplement (PMC7489437)
Supplement: NIHMS1568225-supplement-Supp_info.pdf [file NIHMS1568225-supplement-Supp_info.pdf]

## **Description of Supplemental Data:**

1. Supplemental Figure 1: CONSORT DIAGRAM
2. Supplemental Figure 2: Association of post- induction complete remission and survival
3. Supplemental Figure 3: Association of MPAL clonality and survival.
4. Supplemental Figure 4: Survival for patients receiving ALL chemotherapy alone without hematopoietic stem cell transplantation.
5. Supplemental Table 1: Multivariable analysis of EFS and OS adjusting for starting therapy and HSCT
6. Supplemental Table 2: Description of COG Acute Leukemia of Ambiguous Lineage Task Force

### Supplemental Figure 1: CONSORT DIAGRAM

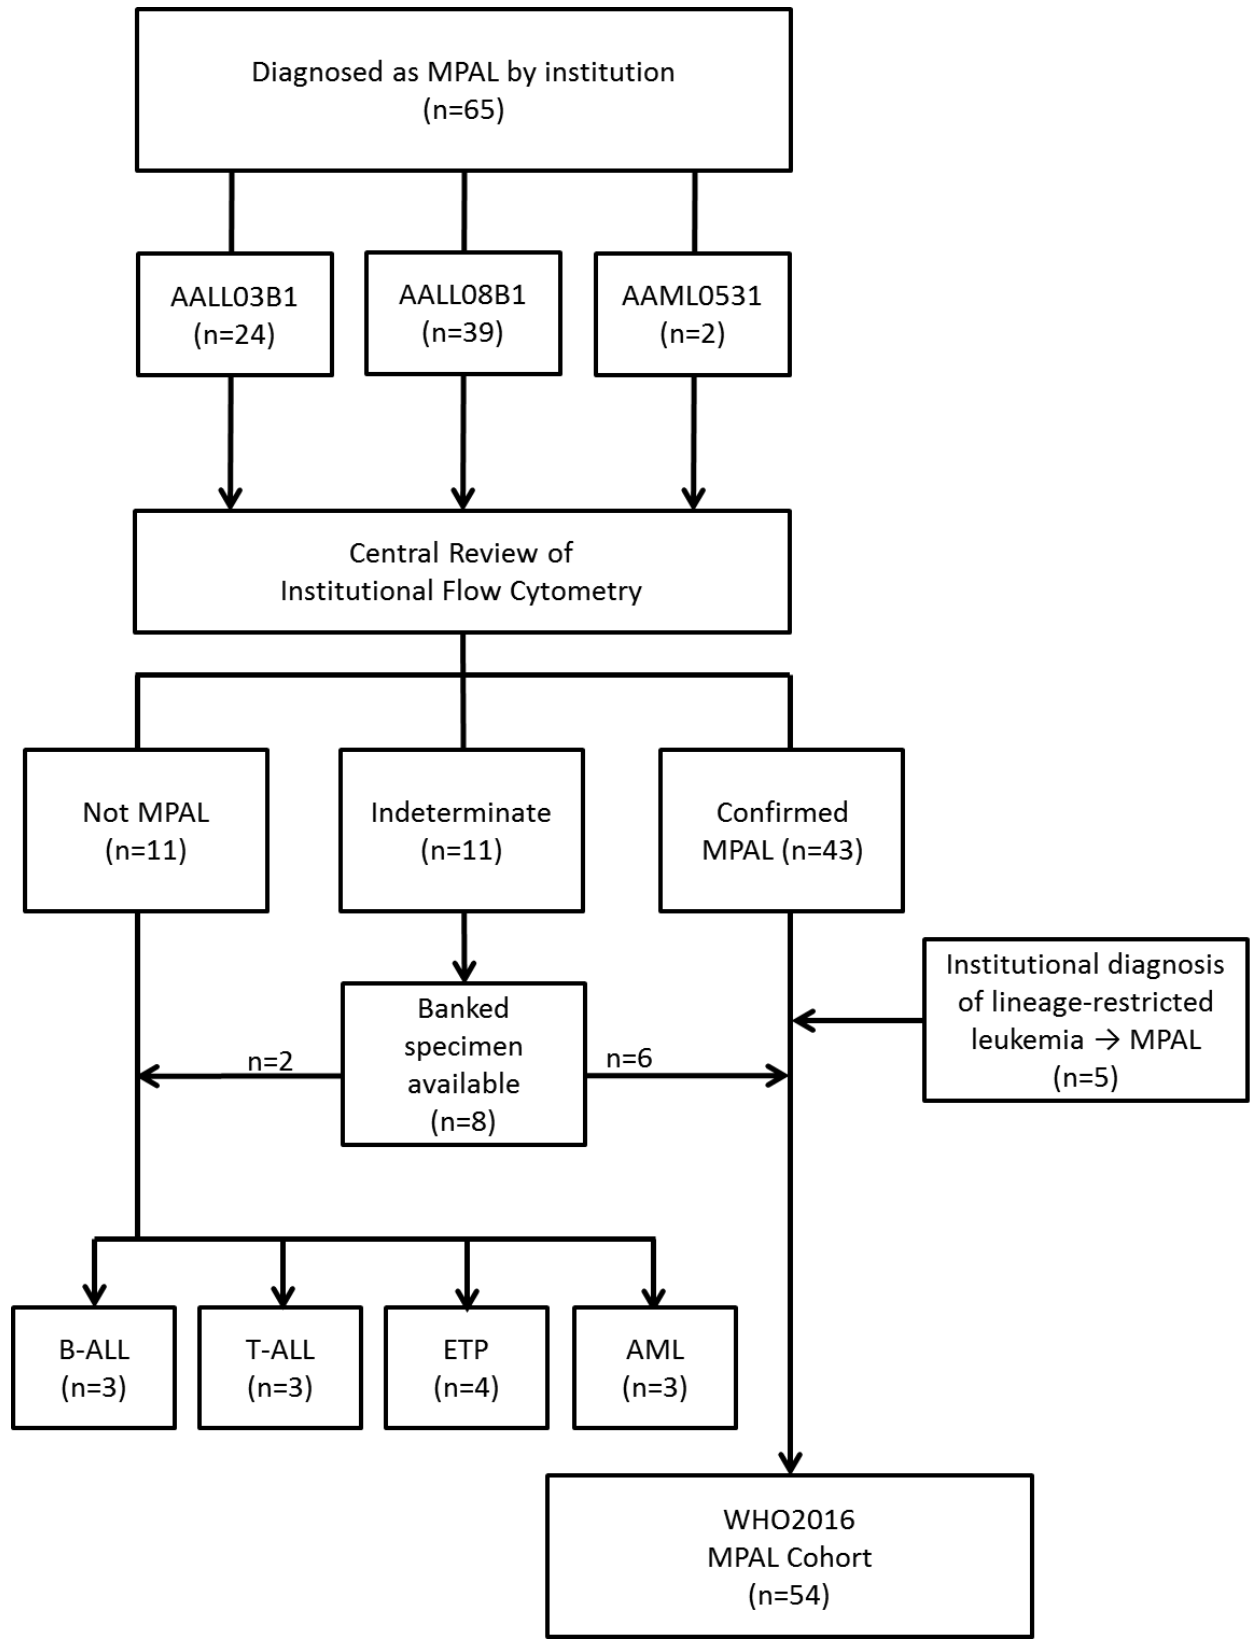



**Supplemental Figure 3: Association of MPAL clonality and survival.** (A) Five-year EFS rates for patients with Bi-phenotypic (Bi-P, one cell population) compared to Bi- or Tri-lineal (Bi-L, two or more distinct cell populations) MPAL were  $71\pm 13\%$  and  $72\pm 11\%$  ( $p=0.803$ ); (B) five-year OS rates were  $75\pm 13\%$  versus  $74\pm 11\%$  ( $p=0.992$ ).

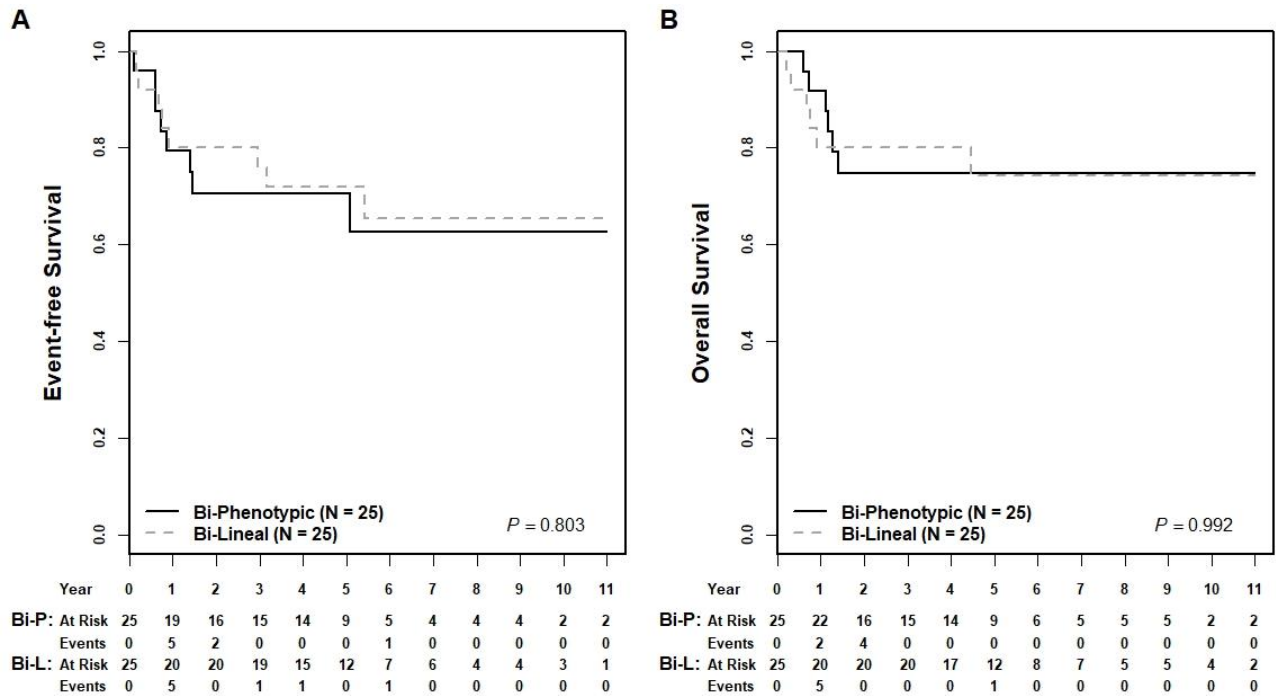

**Supplemental Figure 4: Survival for patients receiving ALL chemotherapy alone without hematopoietic stem cell transplantation.** Five-year EFS and OS rates for patients who received ALL chemotherapy alone without HSCT (n=21) were 75±13% and 84±11%, respectively.

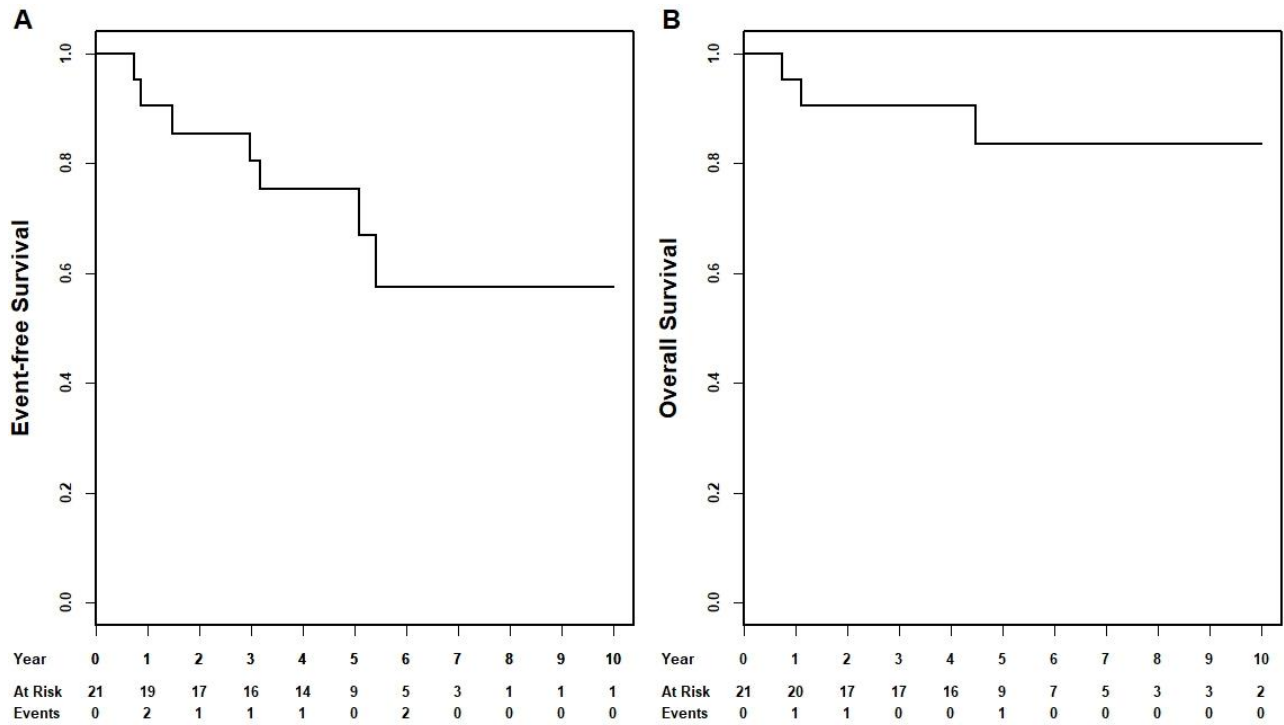

**Supplemental Table 1: Multivariable analysis of EFS and OS adjusting for starting therapy and HSCT**

| Co-variables of interest*               | Univariate Analysis EFS |         | Multivariate Analysis EFS |         | Univariate Analysis OS  |         | Multivariate Analysis OS |         |
|-----------------------------------------|-------------------------|---------|---------------------------|---------|-------------------------|---------|--------------------------|---------|
|                                         | HR (95CI)               | p-value | HR (95CI)                 | p-value | HR (95CI)               | p-value | HR (95CI)                | p-value |
| <b>Starting therapy<br/>ALL vs AML</b>  | 0.772<br>(0.271, 2.193) | 0.627   | 0.703<br>(0.245, 2.020)   | 0.513   | 0.693<br>(0.209, 2.303) | 0.550   | 0.681<br>(0.203, 2.287)  | 0.534   |
| <b>HSCT<br/>No HSCT vs<br/>Any HSCT</b> | 1.826<br>(0.522, 6.384) | 0.346   | 1.932<br>(0.546, 6.840)   | 0.307   | 1.092<br>(0.295, 4.034) | 0.895   | 1.152<br>(0.308, 4.308)  | 0.834   |

\*Only these two co-variables were included in the multivariate analyses. EFS= event free survival; OS = overall survival; ALL = acute lymphoid leukemia; AML = acute myeloid leukemia; HSCT = hematopoietic stem cell transplantation; HR = hazard ratio; 95CI = 95% Confidence Interval

## Supplemental Table 2

### CHILDREN'S ONCOLOGY GROUP ACUTE LEUKEMIA OF AMBIGUOUS LINEAGE TASK FORCE (in alphabetical order)

| <u>Member</u>                 | <u>Institution</u>                                                                |
|-------------------------------|-----------------------------------------------------------------------------------|
| Thomas B. Alexander           | UNC Lineberger Comprehensive Cancer Center (Chapel Hill, NC)                      |
| Todd A. Alonzo**              | University of Southern California (Los Angeles, CA), Children's<br>Oncology Group |
| Jason N. Berman               | IWK Health Centre (Halifax, NS, Canada)                                           |
| Michael J. Borowitz*          | Johns Hopkins University (Baltimore, MD)                                          |
| Erin H. Breese                | Cincinnati Children's Hospital Medical Center (Cincinnati, OH)                    |
| Andrew J. Carroll III*        | University of Alabama at Birmingham (Birmingham, AL)                              |
| Meenakshi Devidas**           | University of Florida (Gainesville, FL), Children's Oncology Group                |
| Alan S. Gamis                 | Children's Mercy Hospital (Kansas City, MO)                                       |
| Terri L. Guinipero            | Nationwide Children's Hospital (Columbus, OH)                                     |
| Nyla A. Heerema*              | The Ohio State University, Wexner Medical Center (Columbus, OH)                   |
| John T. Horan†                | Children's Healthcare of Atlanta (Atlanta, GA)                                    |
| Terzah M. Horton              | Baylor College of Medicine (Houston, TX)                                          |
| Stephen P. Hunger             | Children's Hospital of Philadelphia (Philadelphia, PA)                            |
| Hiroto Inaba                  | St Jude Children's Research Hospital (Memphis, TN)                                |
| Samir B. Kahwash*             | Nationwide Children's Hospital (Columbus, OH)                                     |
| Mignon L. Loh                 | UCSF Medical Center-Mission Bay (San Francisco, CA)                               |
| Soheil Meshinchi              | Seattle Children's Hospital (Seattle, WA)                                         |
| Charles G. Mullighan*         | St Jude Children's Research Hospital (Memphis, TN)                                |
| Matthew J. Oberley*           | Children's Hospital Los Angeles (Los Angeles, CA)                                 |
| Maureen M. O'Brien            | Cincinnati Children's Hospital Medical Center (Cincinnati, OH)                    |
| Etan Orgel†                   | Children's Hospital Los Angeles (Los Angeles, CA)                                 |
| John P. Perentesis            | Cincinnati Children's Hospital Medical Center (Cincinnati, OH)                    |
| Karen R. Rabin                | Baylor College of Medicine (Houston, TX)                                          |
| Elizabeth A. Raetz            | Hassenfeld Children's Hospital, NYU Langone Health (New York,<br>NY)              |
| Sunil S. Raikar               | Children's Healthcare of Atlanta (Atlanta, GA)                                    |
| Reuven J. Schore              | Children's National Medical Center (Washington, DC)                               |
| Alix E. Seif                  | Children's Hospital of Philadelphia (Philadelphia, PA)                            |
| Shalini Shenoy                | Washington University School of Medicine (St Louis, MO)                           |
| Kirk R. Schultz               | British Columbia Children's Hospital (Vancouver, BC, Canada)                      |
| David T. Teachey              | Children's Hospital of Philadelphia (Philadelphia, PA)                            |
| Brent L. Wood*                | University of Washington (Seattle, WA)                                            |
| William G. Woods              | Children's Healthcare of Atlanta (Atlanta, GA)                                    |
| Patrick A. Zweidler-<br>McKay | ImmunoGen, Inc (Waltham, MA)                                                      |

\*Hematopathology/cytogenetics;

\*\*Biostatistician/Data Center;

†Task Force Co-Chair
